# Supplementary material for: Association between amphetamine‐related disorders and dementia‐a nationwide cohort study in Taiwan
Source: PubMed Central journal article supplement (PMC7448166; doi:10.1002/acn3.51113), 2020-06-30

**Dementia-free survival**

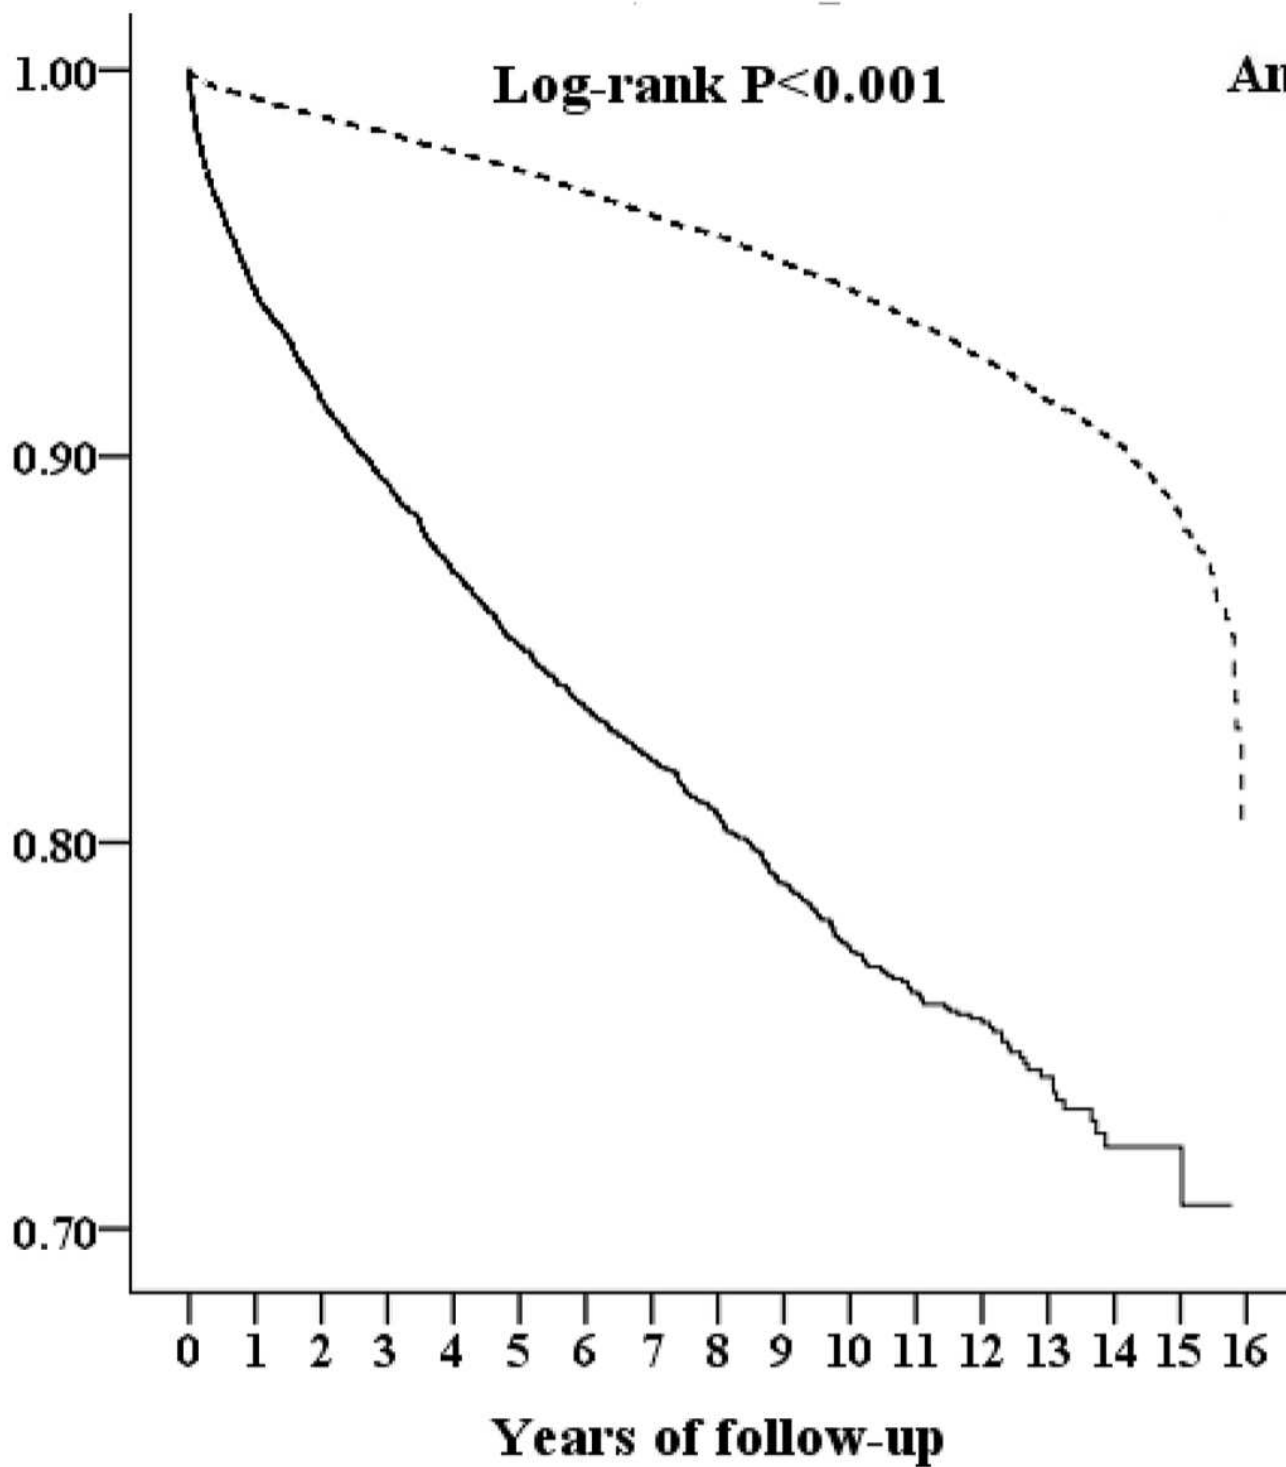

Supplement: ACN3-7-1284-s001.pdf [file ACN3-7-1284-s001.pdf]
